# Supplementary material
Source: publisher site journal article supplement (https://www.dovepress.com/article/224871)
Supplement: Supplementary file 1 [file get_supplementary_file.php]

|  | Simple linear regression analysis | | Multiple linear regression analysis 　using variables that have a high pre-test probability (p<0.10) | | Multiple linear regression analysis 　　　using variables that have been implicated in prior literature | |
| --- | --- | --- | --- | --- | --- | --- |
|  | Standard coefficient | *P*-value | Standard coefficient | *P*-value | Standard coefficient | *P*-value |
| Age (years) | 0.218 | 0.15 |  |  |  |  |
| Male sex (yes vs. no) | 0.191 | 0.20 |  |  | 0.262 | 0.10 |
| Body mass index (kg/m2) | 0.035 | 0.82 |  |  |  |  |
| Peritoneal dialysis vintage (months) | 0.415 | 0.004 | 0.278 | 0.09 | 0.450 | 0.016 |
| CAPD (yes vs. no) | 0.210 | 0.16 |  |  |  |  |
| APD (yes vs. no) | -0.023 | 0.88 |  |  |  |  |
| CAPD and APD (yes vs. no) | -0.187 | 0.21 |  |  |  |  |
| Icodextrin solution (yes vs. no) | -0.190 | 0.21 |  |  |  |  |
| Lactate-buffered solution (yes vs. no) | 0.079 | 0.60 |  |  |  |  |
| Bicarbonate-buffered solution (yes vs. no) | 0.019 | 0.90 |  |  |  |  |
| Weekly total Kt/V | −0.017 | 0.91 |  |  | -0.103 | 0.52 |
| Weekly renal Kt/V | −0.092 | 0.54 |  |  |  |  |
| Weekly peritoneal Kt/V | −0.054 | 0.72 |  |  |  |  |
| Combined therapy with peritoneal dialysis and hemodialysis (yes vs. no) | 0.207 | 0.17 |  |  |  |  |
| Diabetes mellitus (yes vs. no) | 0.262 | 0.08 | 0.116 | 0.53 |  |  |
| Diabetic neuropathy (yes vs. no) | 0.069 | 0.65 |  |  |  |  |
| Diabetic angiopathy (yes vs. no) | 0.217 | 0.15 |  |  |  |  |
| Liver disease (yes vs. no) | 0.047 | 0.76 |  |  | 0.033 | 0.84 |
| Corticosteroid (yes vs. no) | −0.161 | 0.29 |  |  |  |  |
| Antihistamine (yes vs. no) | 0.137 | 0.36 |  |  |  |  |
| Nalfurafine (yes vs. no) | 0.241 | 0.11 |  |  |  |  |
| Topical medicine (yes vs. no) | 0.345 | 0.019 | 0.320 | 0.050 |  |  |
| Calcium-containing phosphate binders (yes vs. no) | 0.261 | 0.08 | 0.243 | 0.16 |  |  |
| Calcium-free phosphate binders (yes vs. no) | −0.073 | 0.63 |  |  |  |  |
| Vitamin D analog (yes vs. no) | 0.102 | 0.50 |  |  |  |  |
| Cinacalcet (yes vs. no) | 0.188 | 0.21 |  |  |  |  |
| Polaprezinc (yes vs. no) | −0.204 | 0.17 |  |  |  |  |
| Erythropoiesis-stimulating agent (yes vs. no) | −0.034 | 0.82 |  |  |  |  |
| Hemoglobin A1c (%) | 0.310 | 0.07 | 0.229 | 0.28 |  |  |
| Total protein (g/dL) | −0.189 | 0.21 |  |  |  |  |
| Serum albumin (g/dL) | −0.250 | 0.09 | -0.108 | 0.52 | -0.153 | 0.38 |
| Blood urea nitrogen (mg/dL) | −0.106 | 0.48 |  |  | -0.247 | 0.17 |
| Creatinine (mg/dL) | 0.083 | 0.59 |  |  |  |  |
| Uric acid (mg/dL) | 0.010 | 0.95 |  |  |  |  |
| Sodium (mmol/L) | 0.014 | 0.92 |  |  |  |  |
| Potassium (mmol/L) | 0.045 | 0.77 |  |  |  |  |
| Chloride (mmol/L) | 0.162 | 0.28 |  |  |  |  |
| Calcium (mg/dL) | −0.138 | 0.36 |  |  | -0.263 | 0.13 |
| Phosphate (mg/dL) | 0.099 | 0.51 |  |  | 0.101 | 0.55 |
| Magnesium (mg/dL) | 0.155 | 0.30 |  |  |  |  |
| Blood sugar (mg/dL) | 0.269 | 0.07 | 0.018 | 0.92 |  |  |
| Hemoglobin (g/dL) | −0.123 | 0.42 |  |  |  |  |
| Bicarbonate (mmol/L) | −0.132 | 0.39 |  |  |  |  |
| Ferritin (ng/mL) | −0.181 | 0.23 |  |  | -0.047 | 0.79 |
| β2 microglobulin (mg/L) | 0.151 | 0.32 |  |  | -0.077 | 0.70 |
| Intact-parathyroid hormone (pg/mL) | −0.091 | 0.55 |  |  | -0.031 | 0.85 |

Supplemental Table 1: Simple and multiple linear regression analyses of the variables correlated with uremic pruritus intensity in the nighttime
